# Supplementary material for: The mechanism of excimer formation: an experimental and theoretical study on the pyrene dimer
Source: Royal Society of Chemistry journal article supplement (doi:10.1039/c7cp03990e), 2017-01-01
Supplement: c7cp03990e1.pdf [file c7cp03990e1.pdf]

# The Mechanism of Excimer Formation: An Experimental and Theoretical Study on the Pyrene Dimer: Supplementary Material

Joscha Hoche,<sup>a,b</sup> Hans-Christian Schmitt,<sup>a,b</sup> Alexander Humeniuk,<sup>a</sup> Ingo Fischer<sup>\*a</sup>, Roland Mitrić<sup>a</sup> and Merle I. S. Röhr<sup>\*a</sup>

---

<sup>a</sup> *Institut für physikalische und theoretische Chemie, Julius-Maximilians-Universität Würzburg, D-97074, Würzburg, Germany E-mail: ingo.fischer@uni-wuerzburg.de, merle.roehr@uni-wuerzburg.de*

<sup>b</sup> *These authors contributed equally to the work.*

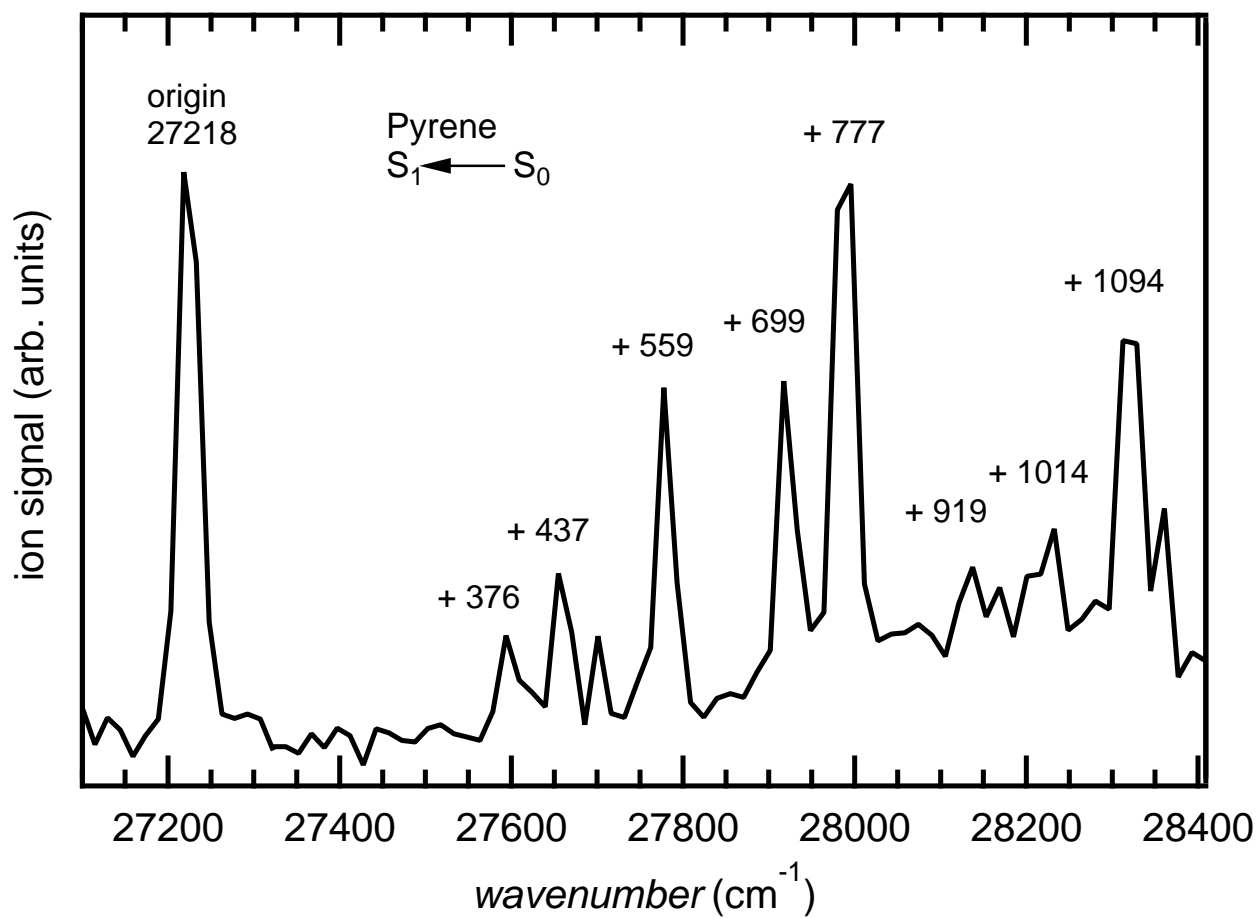

Fig. S1:  $[1 + 2']$ -REMPI of the  $S_1$  state of pyrene using 527 nm as the probe pulses. The origin was found to be  $27218 \text{ cm}^{-1}$ . Several well-resolved vibronic transitions are visible which indicate sufficient cooling in the molecular beam.

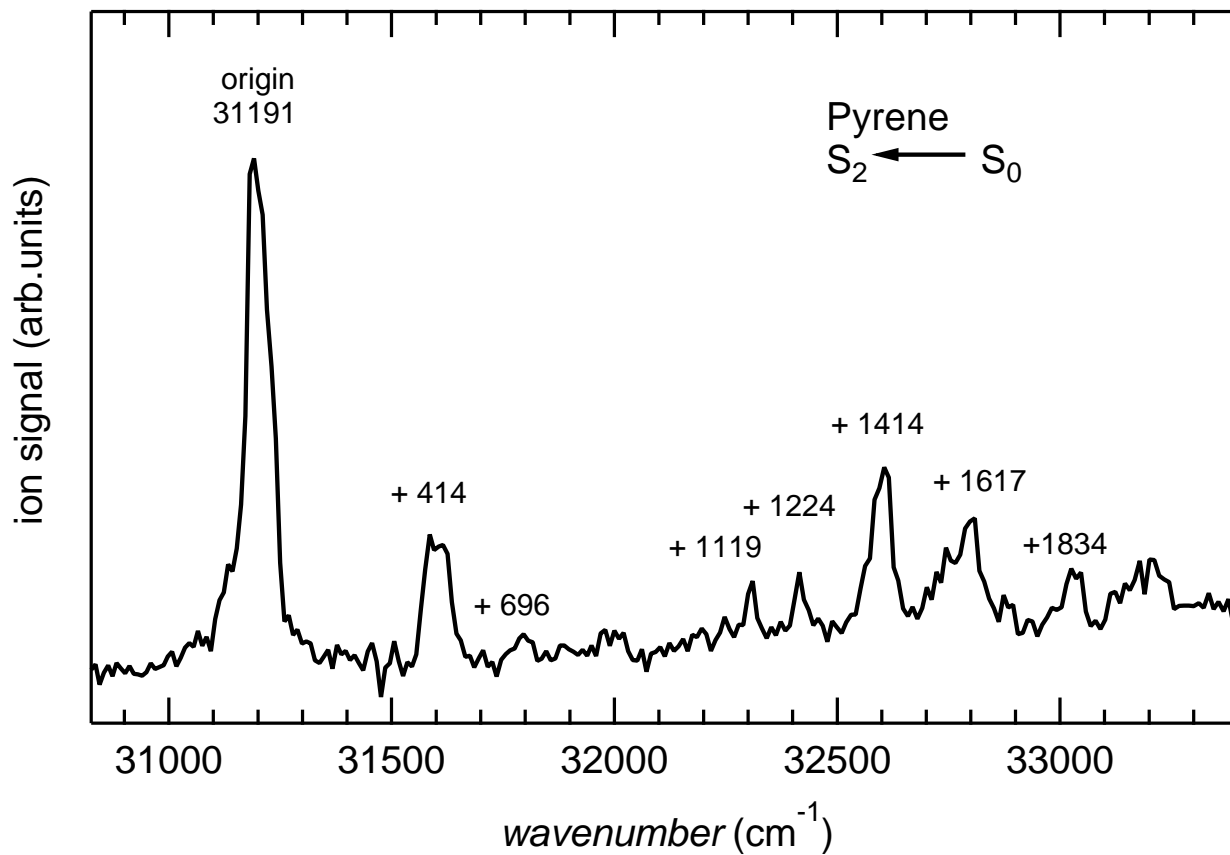

Fig. S2:  $[1 + 2']$ -REMPI of the  $S_2$  state of pyrene using 351 nm as the probe pulses. The origin was found to be 31191  $\text{cm}^{-1}$ . Again several vibronic transitions are visible.

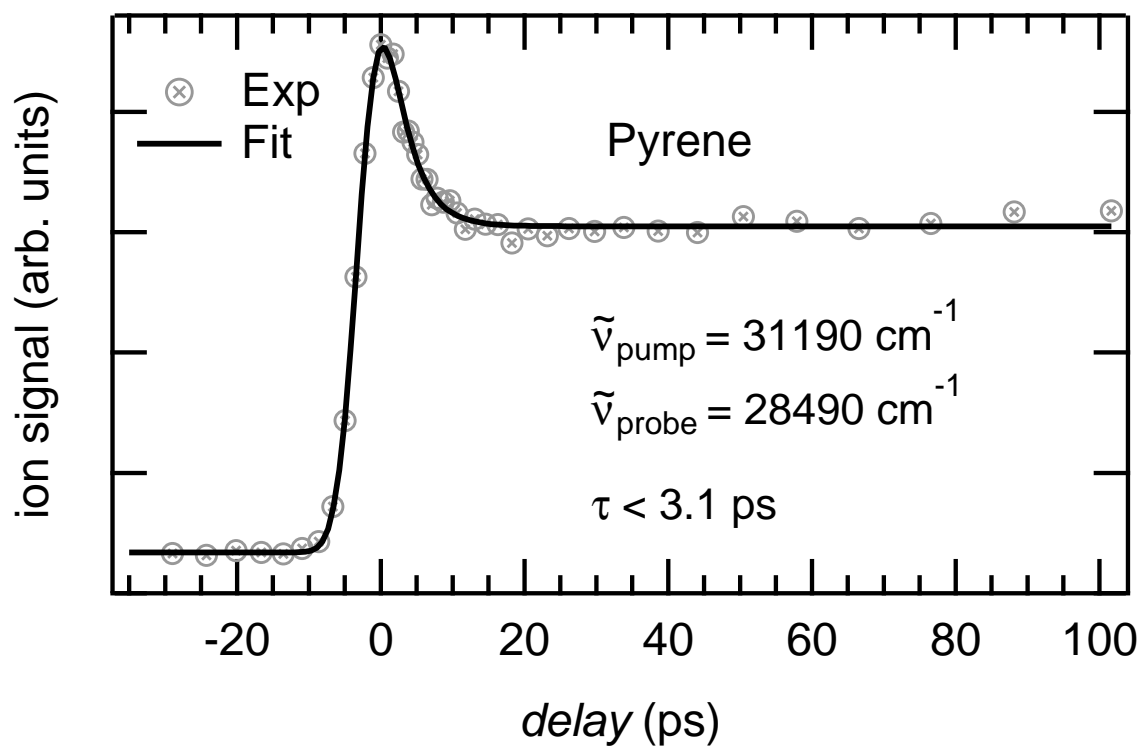

Fig. S3: Delay scan of the pyrene Monomer obtained at the origin (320.6 nm) of the  $S_2$  state using 351 nm as the probe pulses. The signal decays rapidly ( $<3.1$  ps) to a constant level due to IVR from the  $S_2$  zero order state to the coupled  $S_1$  levels.

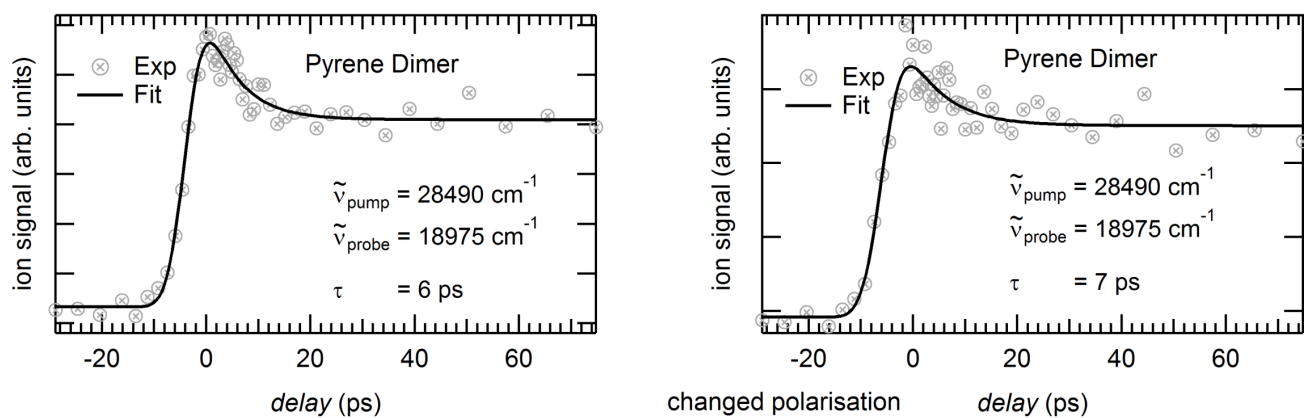

Fig. S4: Delay scans of the pyrene Dimer obtained at 351 nm excitation. The two spectra recorded with parallel (left) and perpendicular (right) polarization of pump- and probe(527 nm)-laser show very similar lifetimes. This indicates that the observed transient is not related to molecular rotation.

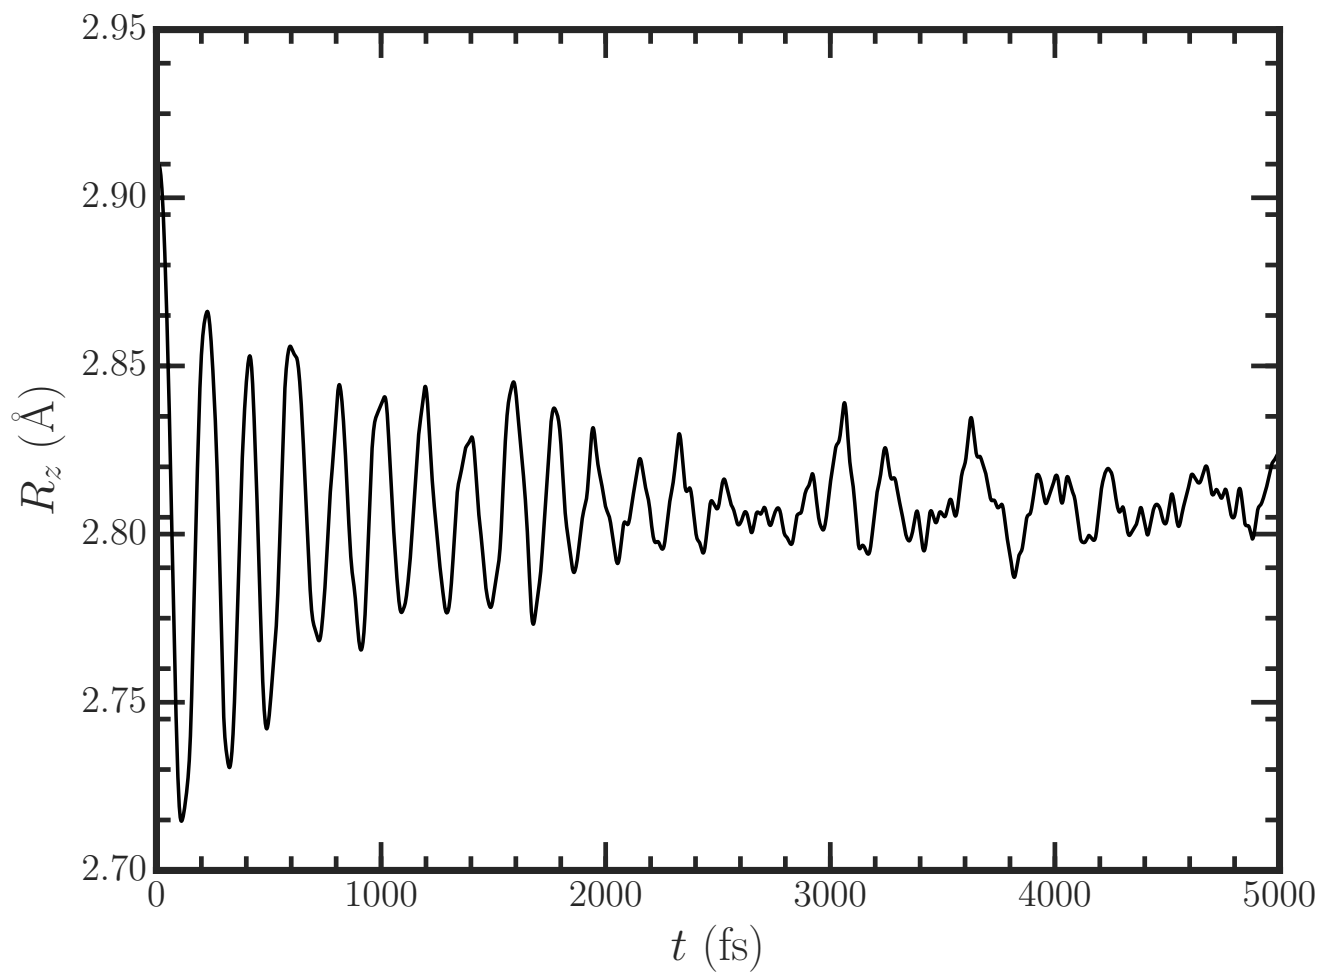

Fig. S5: Stacking distance between the pyrene monomers as a function of time averaged over an ensemble of surface hopping trajectories.

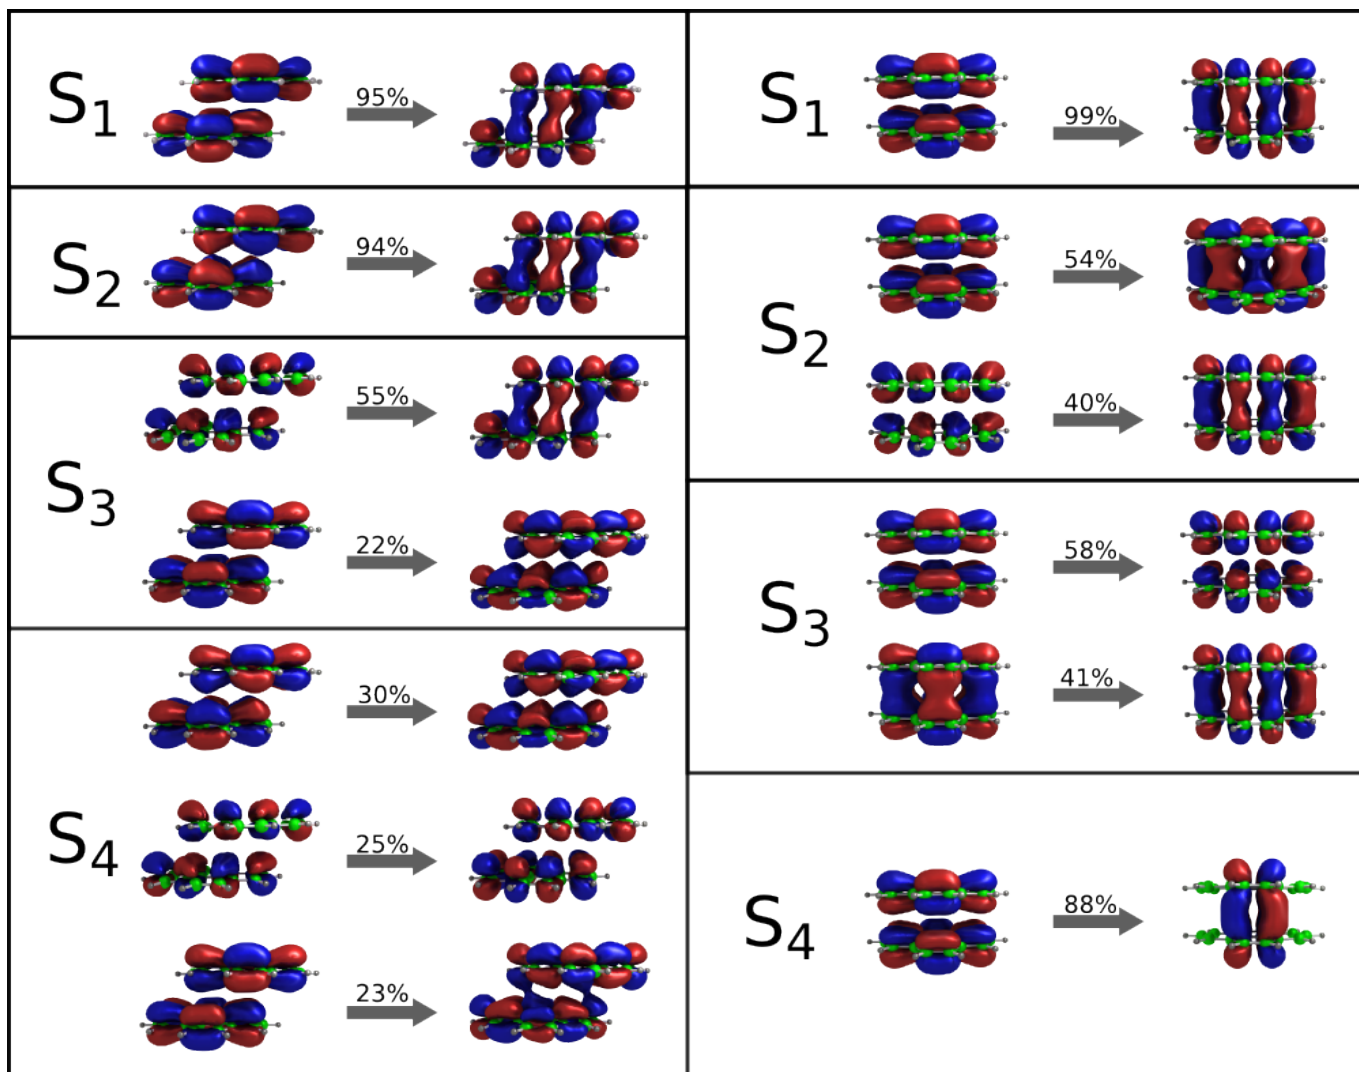

Fig. S6: Natural transition orbitals of the parallel shifted ground state geometry (left) and the fully stacked excimer structure (right) in the framework of TDDFT CAM-B3LYP/def-2SVP.

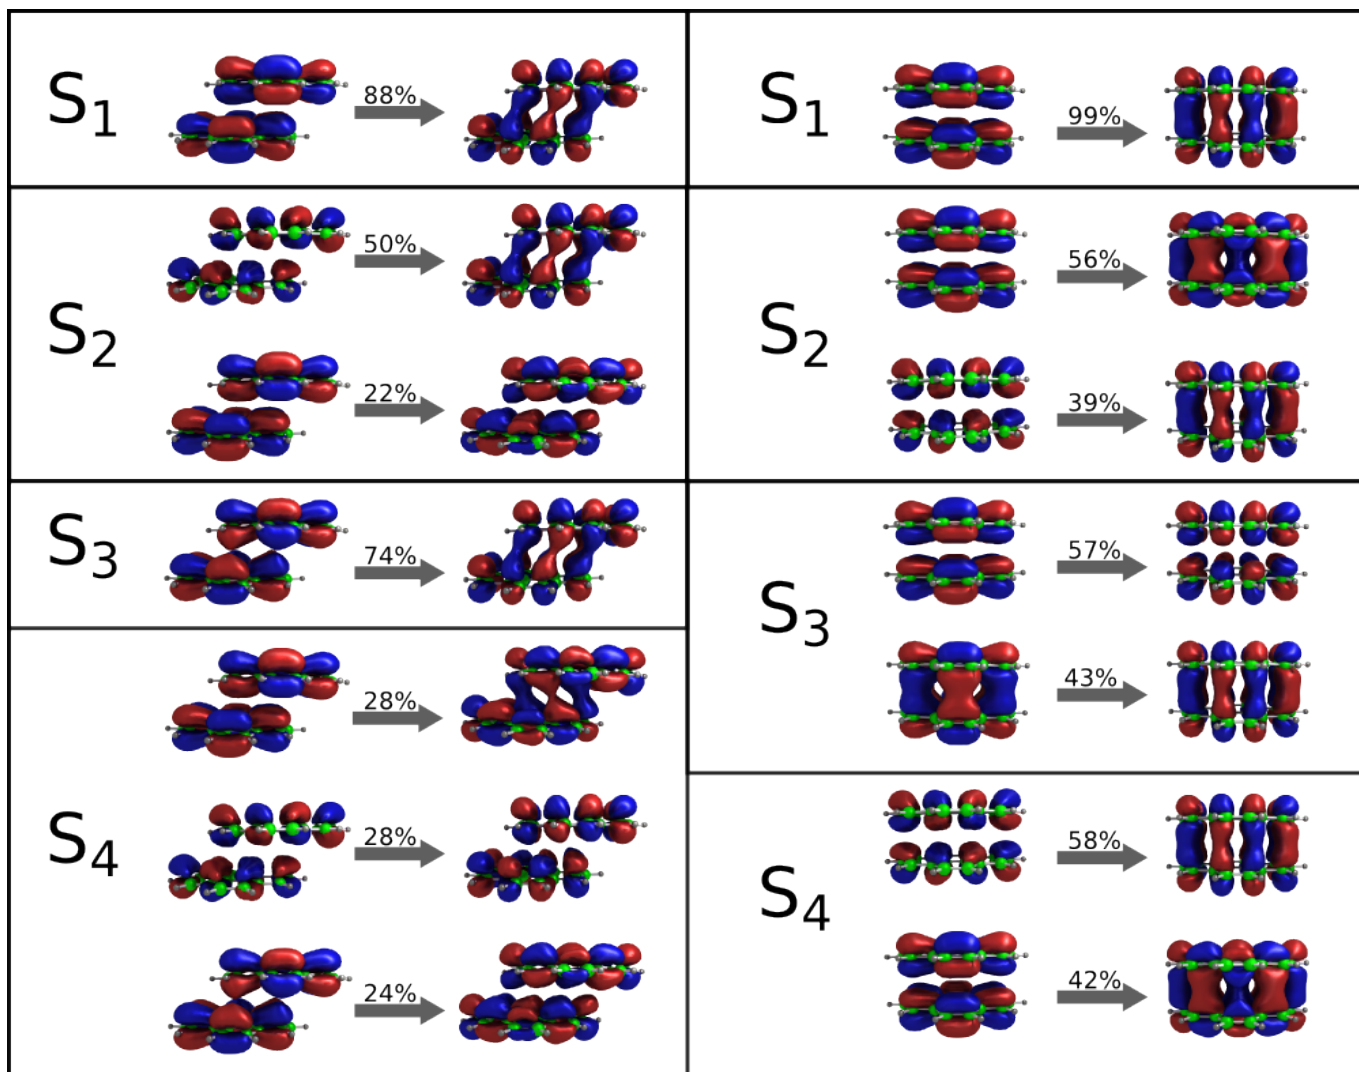

Fig. S7: Natural transition orbitals of the parallel shifted ground state geometry (left) and the fully stacked excimer structure (right) in the framework of TDDFT BHLYP/def2-SVP.



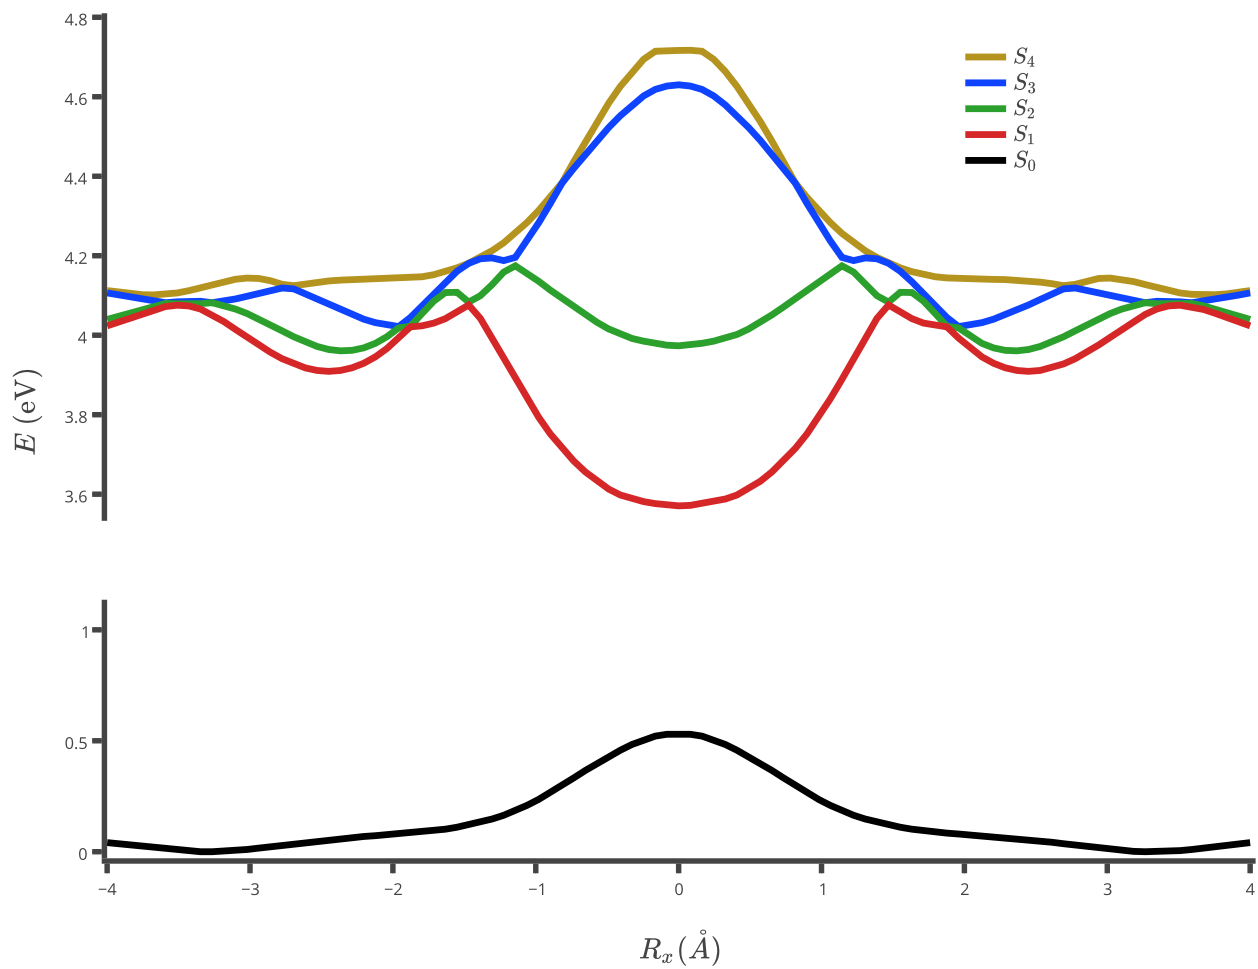

Fig. S8: Energies of the ground ( $S_0$ ) and the four lowest ( $S_1 - S_4$ ) excited states of the pyrene dimer along the parallel shift coordinate ( $R_x$ ) at an interplanar distance ( $R_z$ ) of 3.3 Å. (CAM-B3LYP/def2-SVP)

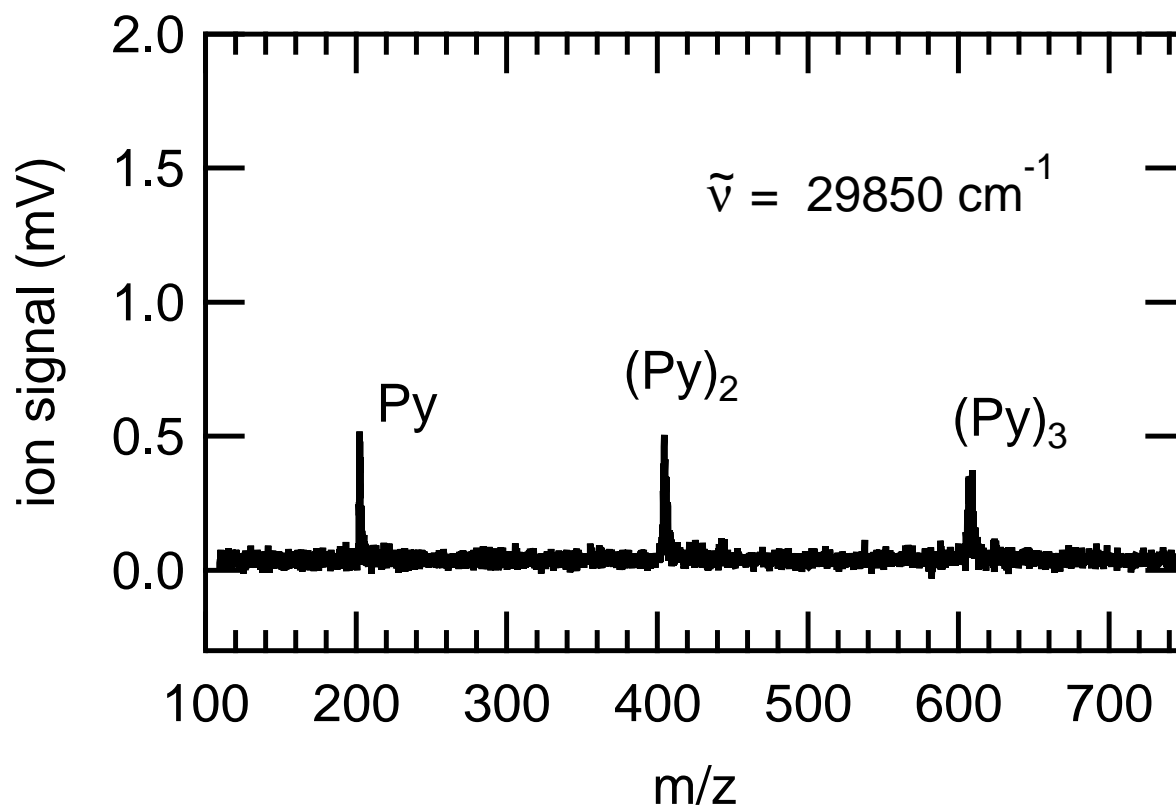

Fig. S9: Mass spectra measured at 335 nm, which corresponds to band maximum of the dimer absorption.

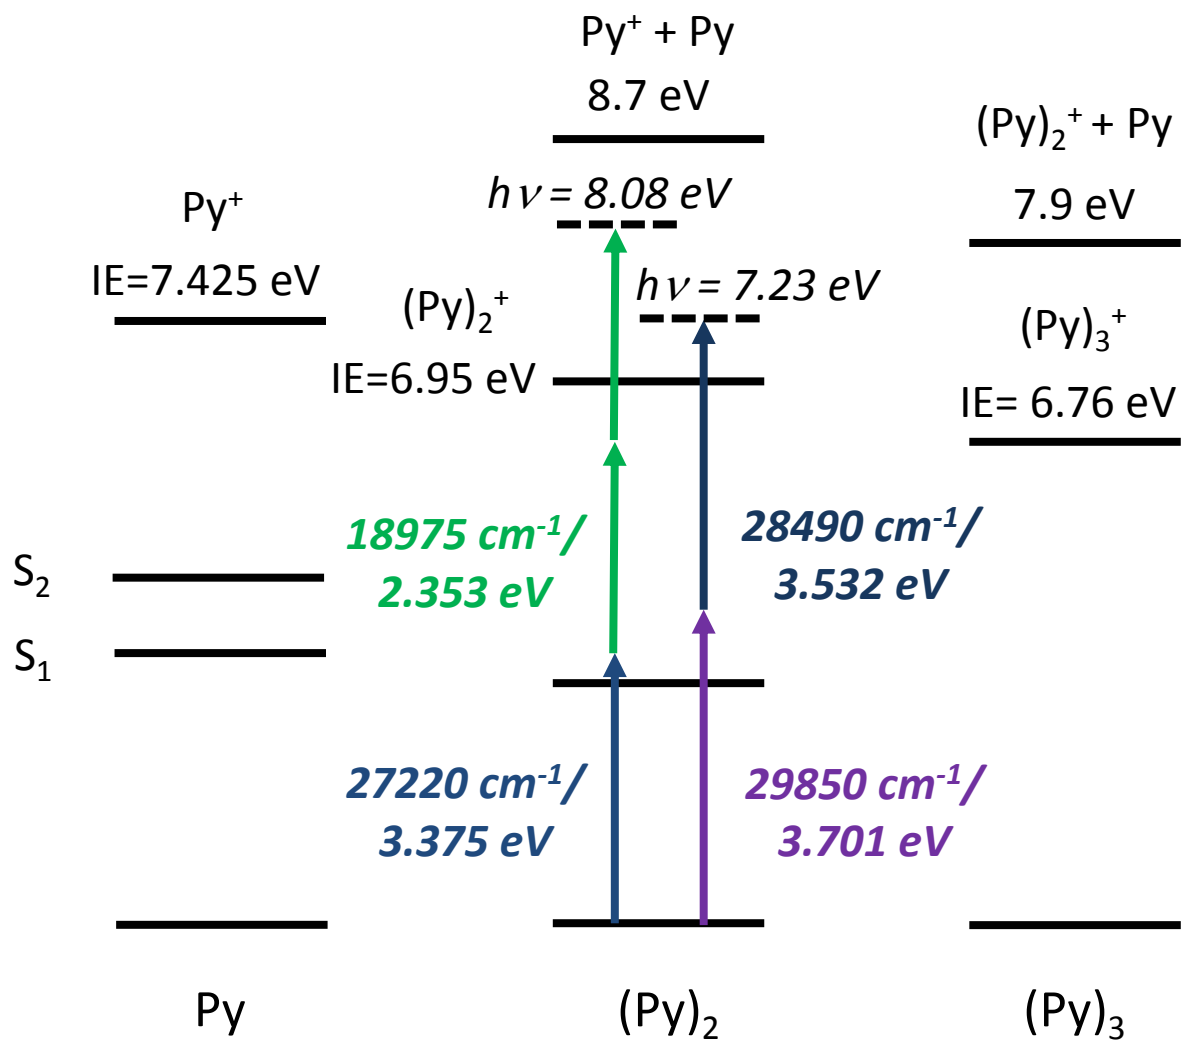

Fig. S10: Ionization and fragmentation thresholds of the pyrene monomer, dimer and trimer.

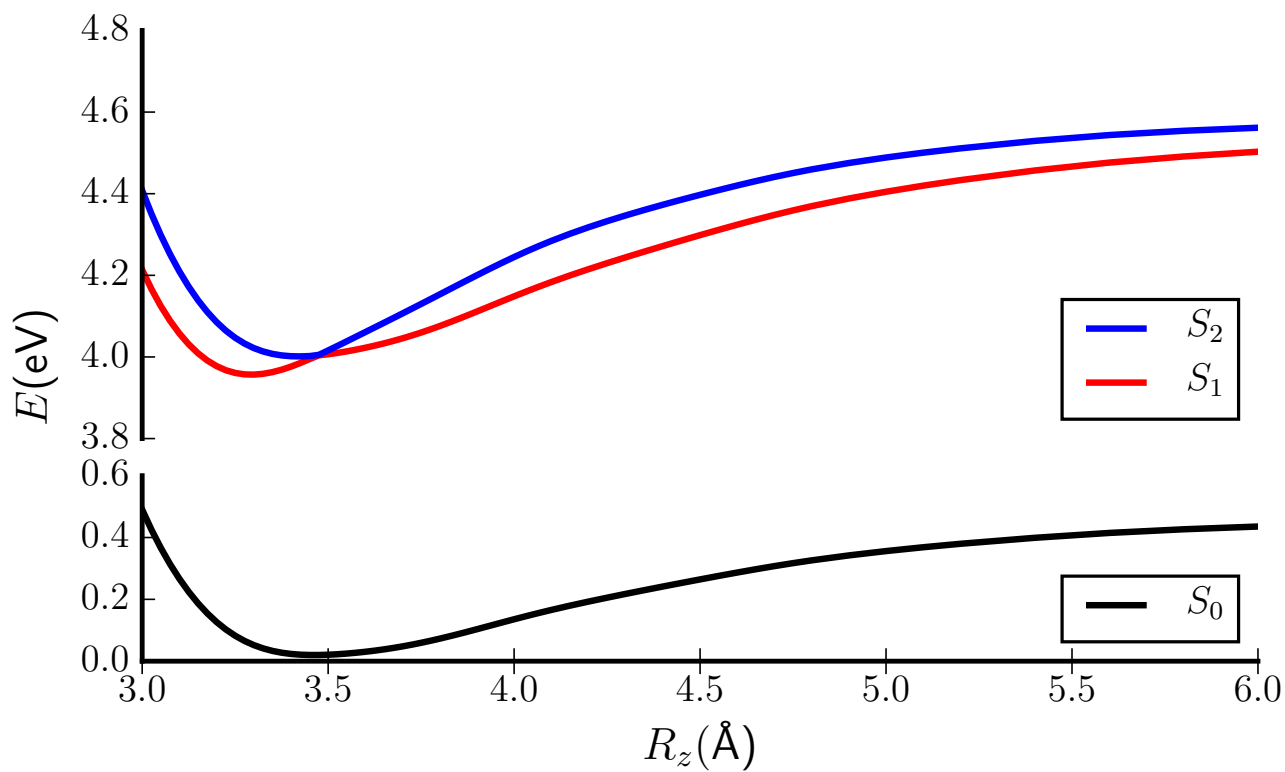

Fig. S11: Energies of the ground ( $S_0$ ) and the two lowest ( $S_1, S_2$ ) excited states of the pyrene dimer along the interplanar distance ( $R_z$ ) in the frame of TDDFT (BH-LYP/TZVP).

Table S1: Calculated vertical transition energies of the ground state minimum of the pyrene dimer and monomer.

|                                 | Dimer S <sub>1</sub> (eV) | Dimer S <sub>2</sub> (eV) | Monomer AE (eV) |
|---------------------------------|---------------------------|---------------------------|-----------------|
| <hr/>                           |                           |                           |                 |
| TDDFT<br>BH-LYP <sup>a</sup>    |                           |                           |                 |
| <hr/>                           |                           |                           |                 |
| def2-SVP                        | 3.95                      | 3.98                      | 4.09            |
| 6-31G*                          | 4.01                      | 4.04                      | 4.14            |
| TZVP                            | 3.99                      | 3.99                      | 4.10            |
| <br>                            |                           |                           |                 |
| TDDFT<br>CAM-B3LYP <sup>a</sup> |                           |                           |                 |
| <hr/>                           |                           |                           |                 |
| def2-SVP                        | 3.51                      | 3.73                      | 4.07            |
| TZVP                            | 3.57                      | 3.82                      | 4.08            |
| <br>                            |                           |                           |                 |
| TDDFTB <sup>a</sup>             | 3.50                      | 3.59                      | 3.53            |
| <br>                            |                           |                           |                 |
| MCQDPT <sup>b</sup>             |                           |                           |                 |
| <hr/>                           |                           |                           |                 |
| 6-31G(d)                        |                           |                           | 3.66            |
| <hr/>                           |                           |                           |                 |

<sup>a</sup> present work

<sup>b</sup> Reference 66.
